# Supplementary material for: Superparamagnetic plasmonic nanoshells for improved imaging, separation and seeding of co-cultured cells
Source: Royal Society of Chemistry journal article supplement (doi:10.1039/c5tb01420d), 2015-01-01
Supplement: c5tb01420d1.pdf [file c5tb01420d1.pdf]

## Supporting Information

### **Superparamagnetic plasmonic nanoshells for improved imaging, separation and seeding of co-cultured cells†**

Xiulong Jin,<sup>‡a</sup> Hongfei Yu,<sup>‡a</sup> Ni Kong,<sup>a</sup> Jiang Chang,<sup>b</sup> Haiyan Li<sup>\*a</sup> and Jian Ye<sup>\*a</sup>

<sup>a</sup> School of Biomedical Engineering & Med-X Research Institute, Shanghai Jiao Tong University, Shanghai 200030, China.

E-mail: [yejian78@sjtu.edu.cn](mailto:yejian78@sjtu.edu.cn); [haiyan.li@sjtu.edu.cn](mailto:haiyan.li@sjtu.edu.cn)

<sup>b</sup> Shanghai institute of Ceramics, Chinese Academy of Sciences, Shanghai 200050, China.

<sup>‡</sup> Co-first author: these authors contributed equally to this work.

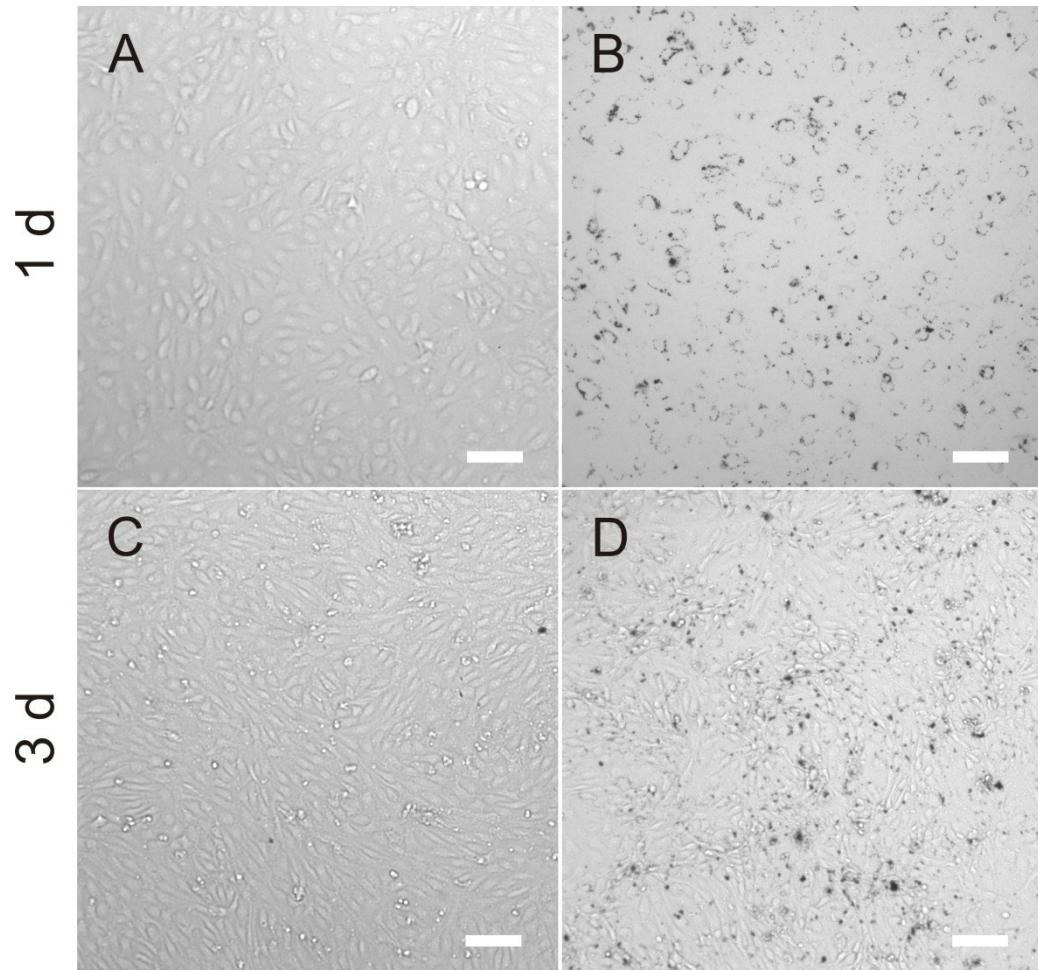

**Fig. S1** Bright field images of HUVECs cultured without (A, C) and with (B, D) 0.02 nM superparamagnetic nanoshells. (A, B) and (C, D) are cultured for 1 and 3 days, respectively. All scale bars are 100  $\mu\text{m}$ .

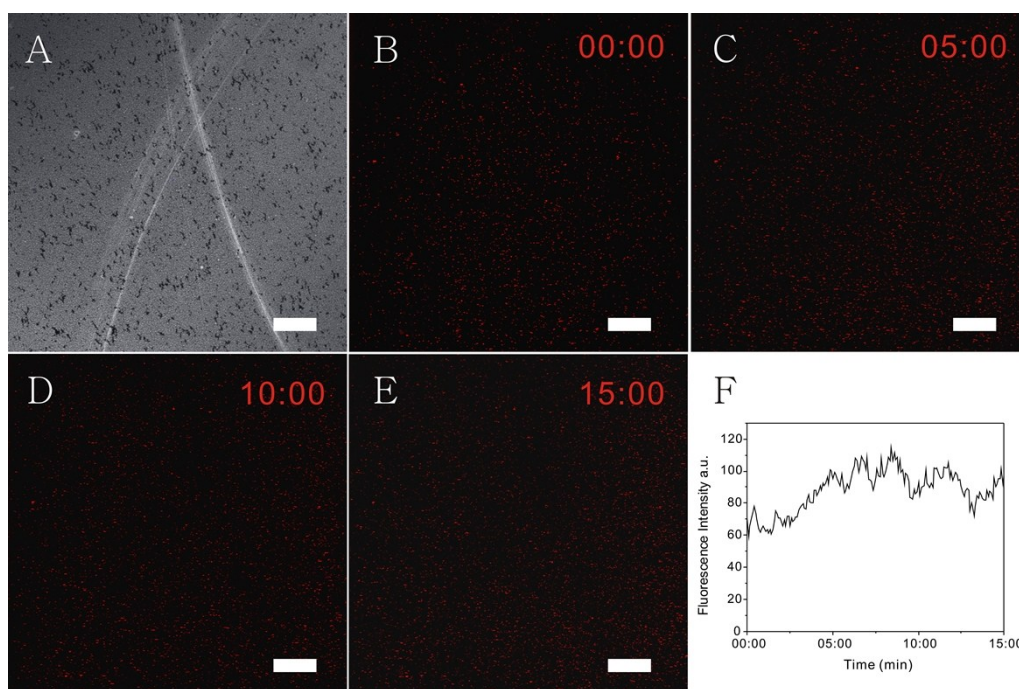

**Fig. S2** Photo-bleaching investigation of SNs (800 nm excitation wavelength, 2 mW power, 16 × water immersion objective, 15 min). (A) Transmission image and (B)-(E) the corresponding TPL image at different time. (F) Luminescence intensity changes with time in measurement region.

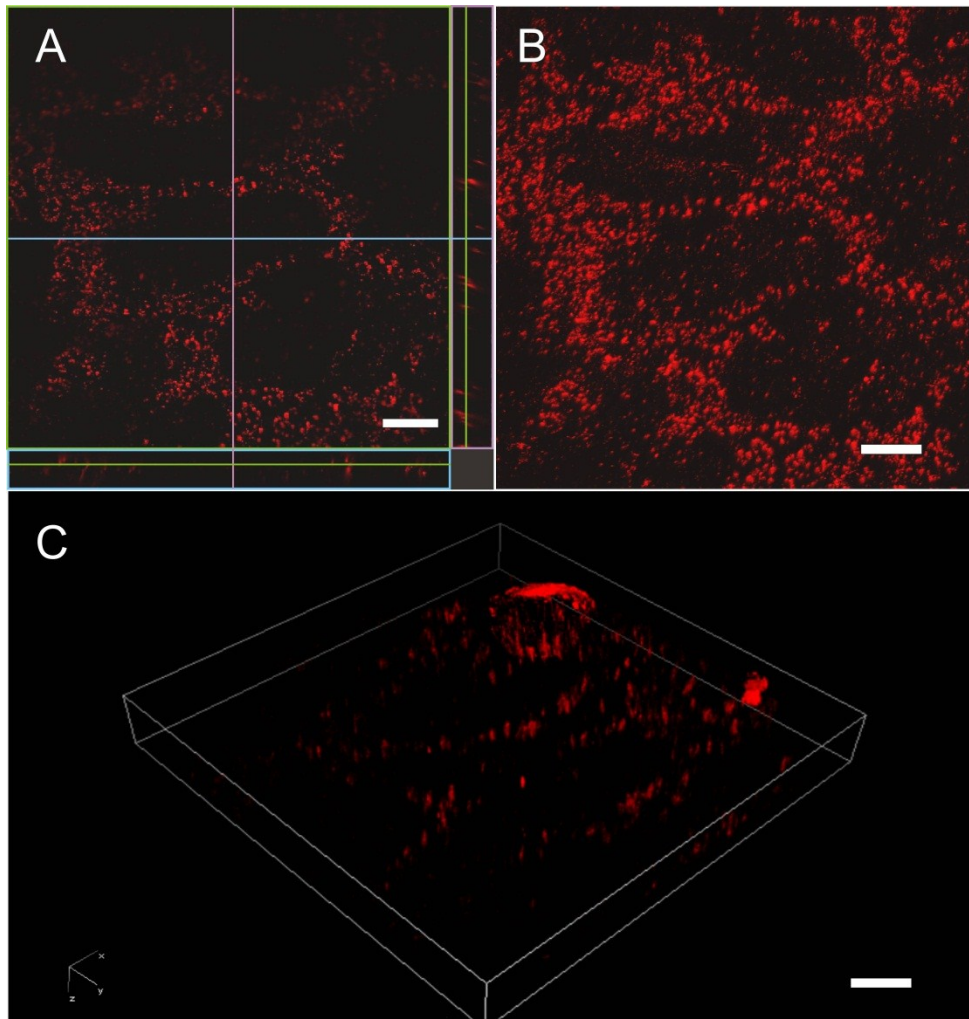

**Fig. S3** 3D TPL visualization images relative to Figure 3F. (A) Sections of the SNs-HUVECs are visualized from three different angles and the lines crossed at a point in the center of the significant tube-like structure formed during the vascularization process. (B) The overlay image of all z-sections. (C) 3D TPL visualization in a tilted direction. Scale bar is 50  $\mu\text{m}$ .

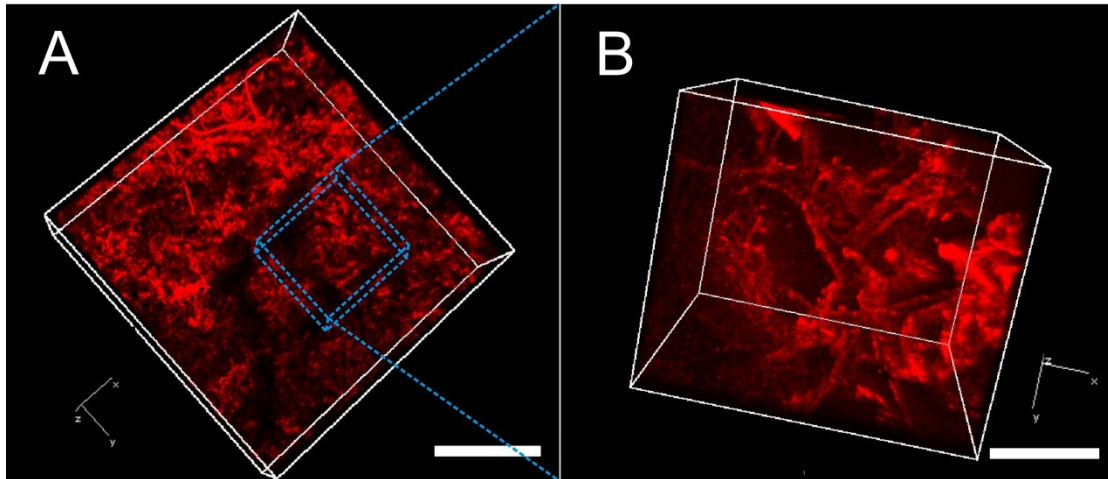

**Fig. S4** (A) 3D TPL visualization of SNs in a PCL scaffold with a view field of  $2.82 \text{ mm} \times 2.82 \text{ mm} \times 0.80 \text{ mm}$  (with a step interval of  $80 \text{ }\mu\text{m}$  in Z direction). (B) An enlarged 3D visualization in (A) with a view field of  $328 \text{ }\mu\text{m} \times 276 \text{ }\mu\text{m} \times 342 \text{ }\mu\text{m}$  (with a step interval of  $1.0 \text{ }\mu\text{m}$  in Z direction). The scale bars in A and B are  $1.0 \text{ mm}$  and  $100 \text{ }\mu\text{m}$ , respectively.

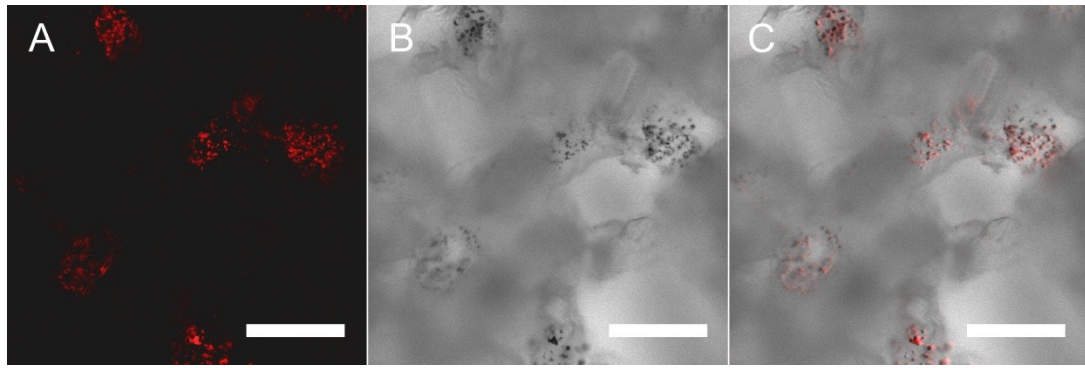

**Fig. S5** *In vitro* angiogenesis study in SNs-HUVECs/HDFs 3D co-culture system in PCL scaffold. (A) TPL image, (B) transmission image and (C) overlay image of HUVECs/HDFs 3D co-culture system after 2 days. All scale bars are 200  $\mu\text{m}$ .
